# Mobility of G proteins is heterogeneous and polarized during chemotaxis

Freek van Hemert<sup>1,\*</sup>, Milena D. Lazova<sup>2,\*</sup>, B. Ewa Snaar-Jagaska<sup>2</sup> and Thomas Schmidt<sup>1,‡</sup>

<sup>1</sup>Leiden Institute of Physics and <sup>2</sup>Leiden Institute of Biology, Leiden University, Niels Bohrweg 2, 2333 CA Leiden, The Netherlands

\*These authors contributed equally to this work

‡Author for correspondence ([schmidt@physics.leidenuniv.nl](mailto:schmidt@physics.leidenuniv.nl))

Accepted 24 May 2010

Journal of Cell Science 123, 2922–2930

© 2010. Published by The Company of Biologists Ltd

doi:10.1242/jcs.063990

## Summary

The interaction of G-protein-coupled receptors with G proteins is a key event in transmembrane signal transduction that leads to vital decision-making by the cell. Here, we applied single-molecule epifluorescence microscopy to study the mobility of both the Gβγ and the Gα2 subunits of the G protein heterotrimer in comparison with the cAMP receptor responsible for chemotactic signaling in *Dictyostelium discoideum*. Our experimental results suggest that ~30% of the G protein heterotrimers exist in receptor-precoupled complexes. Upon stimulation in a chemotactic gradient, this complex dissociates, subsequently leading to a linear diffusion and collision amplification of the external signal. We further found that Gβγ was partially immobilized and confined in an agonist-, F-actin- and Gα2-dependent fashion. This led to the hypothesis that functional nanometric domains exist in the plasma membrane, which locally restrict the activation signal, and in turn, lead to faithful and efficient chemotactic signaling.

**Key words:** Directional sensing, G protein signaling, G-protein-coupled receptor, Single-molecule biophysics

## Introduction

G-protein-mediated signaling is a widely used mechanism for transmembrane signal transduction. It entails a seven-transmembrane receptor, the G-protein-coupled receptor (GPCR), and a heterotrimeric G protein consisting of a Gα and a heterodimeric Gβγ subunit. Compared with other transmembrane signaling systems, the complex, modular mechanics of G-protein-linked signaling allows for divergence, convergence and regulation to take place at the level of the GPCR–G protein complex by modulation of their interaction (Wetschreck and Offermanns, 2005). Mammalian genomes generally encode more than 1000 GPCRs, the majority of which do not have a known ligand. Although the atomic structure of three GPCRs has been resolved (Palczewski et al., 2000; Rasmussen et al., 2007; Jaakola et al., 2008), a mechanism for how ligand induced conformational changes lead to G protein activation is still unknown. Even the simple question of whether GPCRs and G proteins can exist together in a stable complex or interact dynamically has been solved for only one system (Nobles et al., 2005). In the dogmatic view, the ligand-based activation of the GPCR promotes the exchange of guanosine diphosphate (GDP) for guanosine triphosphate (GTP) in the Gα subunit, which subsequently dissociates from the complex, allowing both Gα and Gβγ to engage in downstream signaling. Hydrolysis of GTP to GDP in the Gα subunit, either autocatalytically or by effector proteins, leads to reassociation of the GPCR–Gαβγ complex.

An intriguing system in which GPCR signaling leads to a dramatic change in cellular behavior is that of eukaryotic chemotaxis. Chemotaxis controls the developmental cycle in the social amoeba *Dictyostelium discoideum*. Generally, chemotaxis is interpreted as a three-stage process starting with gradient sensing, followed by cellular polarization and ultimately results in directional movement. *D. discoideum* cells secrete cyclic adenosine monophosphate (cAMP), which acts as a chemoattractant leading to cell

aggregation. Aggregation is achieved by a chemotactic process initiated by activation of the cAMP receptor 1 (cAR1), which in turn activates a G protein heterotrimer, consisting of a Gα2 and a Gβγ subunit (Kimmel and Parent, 2003). Sequencing of the *D. discoideum* genome showed that there is a single Gβ and a single Gγ subunit type in *D. discoideum* (Lilly et al., 1993; Zhang et al., 2001). Consequently, the Gβγ heterodimer participates in all GPCR-triggered responses. Receptor-mediated activation of heterotrimeric G protein complexes was visualized in *D. discoideum* using fluorescence resonance energy transfer (FRET) between the Gα2 and Gβ subunits, fused to cyan and yellow fluorescent proteins, respectively (Janetopoulos et al., 2001). These FRET experiments demonstrated that G protein heterotrimers are stable in the absence of agonist and rapidly dissociate upon addition of cAMP. Recently, the FRET experiments were complemented with fluorescence recovery after photobleaching (FRAP) data. A new model for G protein signaling was suggested in which the Gα2 increases the time it spends on the membrane or in a cAR1-bound state and the activated Gβγ subunit to dissociate into the cytosol. Both processes will lead to a cycling of the G protein heterotrimer between the membrane-bound and a free cytosolic state (Elzie et al., 2009).

Although many molecular details of the pathways are known, a direct connection between gradient sensing and the movement machinery is still to be determined. There are several pathways currently known to act in parallel downstream of G protein activation that mediate the final chemotactic response. The most thoroughly studied pathway involves phosphoinositide 3-kinase (PI3K) and its antagonist, a phosphoinositide 3-phosphatase (PTEN). The coordinated action of both leads to local accumulation of phosphatidylinositol (3,4,5)-trisphosphate [PtdIns(3,4,5)P<sub>3</sub>] at the leading edge of the crawling cells (Iijima and Devreotes, 2002; Funamoto et al., 2002). Recently, additional signaling pathways have been found to act in parallel: the phospholipase A2 (PLA2) (Chen et al., 2007), the soluble guanylyl cyclase (sGC) (Veltman

et al., 2006), and the TorC2 (Kamimura et al., 2008) pathways all cooperate, presumably to achieve higher chemotactic efficiencies (Veltman et al., 2008).

In cells placed in a gradient of cAMP, the pathways downstream of G protein signaling trigger actin polymerization selectively in the cell leading edge, whereas actin polymerization occurs globally upon uniform cAMP stimulation (Chen et al., 2003). Unlike the highly polarized localization in actin polymerization and the preceding highly polar translocation of a variety of intracellular signaling molecules such as  $\text{PtdIns}(3,4,5)\text{P}_3$  and  $\text{PtdIns}(4,5)\text{P}_2$ , receptor localization is fully homogeneous. The  $\text{G}\beta\gamma$  subunit of the G protein is localized in a shallow anterior–posterior gradient, at a level of polarization that is impossible to restrict signaling to the leading edge (Jin et al., 2000). Recent studies (de Keijzer et al., 2008) revealed, however, a spatially restricted increase of receptor mobility in the leading edge of *D. discoideum* cells when exposed to a stable cAMP gradient. Those data suggested an asymmetry in the activation level of the receptor–G-protein pathway with a predicted linear amplification of the local activation level of the G proteins.

Here, we set out to address this prediction. We analyzed  $\text{G}\alpha 2$  and  $\text{G}\beta\gamma$  mobility in the absence of agonist, upon uniform cAMP stimulation, and in a cAMP gradient using single-molecule epifluorescence microscopy (Schmidt et al., 1996). We found that  $\text{G}\alpha 2$  and  $\text{G}\beta\gamma$  occur as a smaller (~30%) receptor-precoupled fraction, and a larger (~70%) receptor-uncoupled fraction. Upon global stimulation with cAMP, the receptor-coupled fraction disappeared. In terms of the receptor, those occupation numbers correspond to about 50% of all available receptors. The activated  $\text{G}\beta\gamma$  molecules immobilize in an F-actin-dependent manner. Concurrently, the formation of F-actin-dependent domains of ~600 nm was observed. Strikingly, the dramatic changes in mobility were restricted to the leading edge of chemotaxing cells. We propose that  $\text{G}\beta\gamma$  immobilization is caused by its incorporation into a larger signaling complex, a signalosome, for which F-actin functions as a scaffold. Such a mechanism would lead to stabilization of pseudopods and the formation of a persistent leading edge by means of a direct F-actin–G-protein feedback loop.

## Results

### Heterogeneity in the mobility of $\text{G}\alpha 2$ -YFP and $\text{G}\beta$ -YFP in the absence of agonist

*D. discoideum* cells were transformed stably with  $\text{G}\alpha 2$ -YFP or  $\text{G}\beta$ -YFP constructs to analyze the mobility of individual  $\text{G}\alpha 2$  and  $\text{G}\beta$  molecules, respectively. The fluorescent fusion proteins were shown to be functional because they rescued the developmental and chemotactic defects of  $\text{g}\alpha 2^-$  and  $\text{g}\beta^-$  cells. In contrast to  $\text{g}\alpha 2^-$  and  $\text{g}\beta^-$  cells, which are both fully deficient in cAMP-induced responses, the  $\text{G}\alpha 2$ -YFP  $\text{g}\alpha 2^-$  and  $\text{G}\beta$ -YFP  $\text{g}\beta^-$  transformants faithfully crawl towards a cAMP source and rescue the developmental cycle started upon starvation (Jin et al., 2000; Janetopoulos et al., 2001).

Single-molecule microscopy, a combination of regular wide-field microscopy with laser excitation and ultra-sensitive CCD camera detection (Schmidt et al., 1996), was used to observe the diffusion of  $\text{G}\alpha 2$ -YFP and  $\text{G}\beta$ -YFP on the apical cellular membrane of *D. discoideum*. Measurements on the apical membrane eliminate any potential influence of the substrate surface on mobility. Fluorescence images were taken consecutively for up to 500 images per sequence at an imaging rate of 20 Hz. Diffraction-limited fluorescent signals with signal strengths comparable with that

reported for individual monomeric YFP molecules (Harms et al., 2001) were observed and followed over time (Fig. 1B,C). Given the signal-to-noise ratio achieved, the position of each molecule was determined to an accuracy of ~40 nm. Statistical significance of all results was assured by the analysis of more than 40 cells for each experimental condition. In total, our analysis is based on  $1 \times 10^4$  to  $4 \times 10^4$  observed molecules per condition.

Particle image correlation spectroscopy (PICS) (Semrau and Schmidt, 2007) was subsequently applied to construct the cumulative probability (cumulative density function, c.d.f.) of the

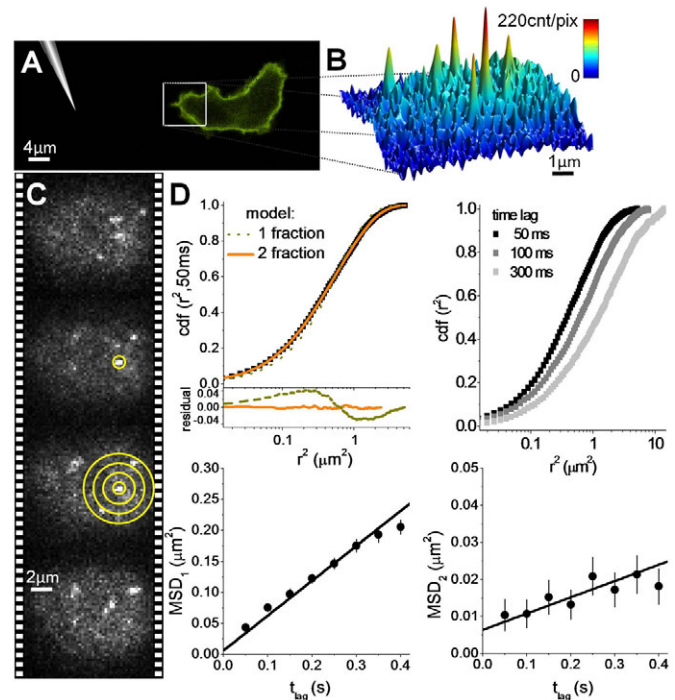

**Fig. 1. Experimental set-up.** (A) A micropipette containing 10 μM cAMP is used to create a stable concentration gradient around its opening. *D. discoideum* cells in the vicinity of the pipette polarize within minutes and move up the cAMP concentration gradient. The anterior and posterior of a cell was defined as the part closest and farthest away from the pipette, respectively. (B) A 514 nm laser beam was focused on the apical cell membrane where signals originating from individual  $\text{G}\beta$ -YFP or  $\text{G}\alpha 2$ -YFP proteins were observed with a signal-to-noise ratio of ~30. (C) The image stacks were scanned for single molecule signatures of which the positions were determined to an accuracy of ~40 nm by fitting to a 2D Gaussian profile. Using particle image correlation spectroscopy (PICS), the cumulative probability density as a function of jump distance ( $r^2$ , yellow circles) for each time lag ( $t_{lag}$ =50 mseconds between subsequent images) [ $\text{cdf}(r^2, t_{lag})$ ] was constructed. (D)  $\text{cdf}(r^2)$  at a time lag of 50 mseconds is fitted to a two-component model (Eq. 4, orange solid line) [one-component model is shown for comparison (Eq. 3, dark-yellow dashed line)]. This results in 2 MSDs and a size denominator for both fractions,  $\alpha$  and  $1-\alpha$  (top left). The same process is repeated for multiple time lags (up to eight), as expected the data shifts with time lag towards higher squared displacements (top right). The mean-squared displacements are plotted versus time lag for the slow fraction (bottom left) and the fast fraction (bottom right) of  $\text{G}\beta$ -YFP in naive wt cells. The free-diffusion model (Eq. 1) yielded diffusion constants of  $D_1=0.15 \pm 0.01 \mu\text{m}^2/\text{second}$  and  $D_2=0.011 \pm 0.001 \mu\text{m}^2/\text{second}$ . The offset at zero time lag,  $s_0$ , in C and D is given by the limited positional accuracy,  $s_0=4\sigma_0^2=0.0064 \mu\text{m}^2$ . The mobility of the slow fraction is equivalent to that of the cAMP receptor  $D_{CAR}=0.012 \mu\text{m}^2/\text{second}$  (data not shown). Error bars indicate s.e. obtained from ten bootstrap runs of the fitting routine.

squared displacements for time-lags of 0.05–0.4 seconds (Fig. 1C,D). To our surprise, it became obvious for all c.d.f. values that G protein mobility was not homogeneous and was best described by a two-fraction model (Fig. 1D), which, after fitting, yielded a fraction size and two mean-squared displacements per time lag (see the Materials and Methods). The result of a final analysis is shown in Fig. 1D for the fast and slow fraction of G $\beta$ -YFP in non-stimulated aggregation-competent cells, respectively (see Fig. 3 for results on G $\alpha$ 2-YFP). For both fractions, the mean-squared displacement, MSD, increased linearly with time lag, indicative of free Brownian motion of the proteins within the membrane characterized by diffusion constant  $D$ ,

$$MSD(t_{lag}) = 4Dt_{lag} + s_0, \quad (1)$$

where the offset,  $s_0$ , accounts for the limited positional accuracy,  $\sigma$ , in the experiment ( $s_0 = 4\sigma^2 = 0.0064 \mu\text{m}^2$  with  $\sigma = 40$  nm). Because the G $\gamma$  subunit has been shown to be essential for the membrane localization of G $\beta$  (Zhang et al., 2001) we assume, in what follows, that G $\beta\gamma$  is in heterodimeric form and all information obtained for G $\beta$  reflects in an identical manner the behavior of G $\gamma$ . For G $\beta\gamma$ -YFP in unstimulated cells, the fast fraction was characterized by a diffusion constant  $D_1 = 0.15 \pm 0.01 \mu\text{m}^2/\text{second}$ , and the slow fraction, consisting of  $32 \pm 3\%$  of all molecules, was characterized by  $D_2 = 0.011 \pm 0.001 \mu\text{m}^2/\text{second}$ . For the membrane-bound G $\alpha$ 2-YFP in unstimulated cells the respective diffusion constants of the fast and the slow fraction were  $D_1 = 0.14 \pm 0.01 \mu\text{m}^2/\text{second}$  and  $D_2 = 0.015 \pm 0.001 \mu\text{m}^2/\text{second}$ , with the slow fraction constituting  $32 \pm 4\%$  of the total pool of molecules (Fig. 3). Identical results for the mobility and fraction size of G $\alpha$ 2 and G $\beta\gamma$  were obtained in  $g\alpha 2^-$  and  $g\beta^-$  cells that expressed G $\alpha$ 2-YFP and G $\beta$ -YFP, respectively, at endogenous levels (supplementary material Fig. S1). The latter findings proved that the predominant fast fraction was not an artifact caused by the overexpression of the constructs in a wild-type background.

### Mobility suggests the existence of a receptor–G-protein precoupled complex in the absence of agonist

The strong similarity of the diffusion constants of both fractions for G $\alpha$ 2 and G $\beta\gamma$  further suggests that all membrane-bound G proteins in unstimulated cells were G $\alpha$ 2 $\beta\gamma$  heterotrimers. It is tempting to associate the slow mobility fractions of G $\alpha$ 2 and G $\beta\gamma$  to a receptor–G-protein precoupled complex. The G protein diffusion constants ( $D_2 = 0.015 \mu\text{m}^2/\text{second}$  for G $\alpha$ 2 and  $D_2 = 0.011 \mu\text{m}^2/\text{second}$  for G $\beta\gamma$ ) were similar to that found for the fast fraction of the receptor cAR1 [MSD(44 mseconds) =  $0.034 \mu\text{m}^2$  (de Keijzer et al., 2008);  $D = 0.015 \mu\text{m}^2/\text{second}$ , our unpublished results). However, the diffusion constants of the fast fractions of the G protein subunits in unstimulated, aggregation-competent cells were one order of magnitude higher than that found for cAR1, demonstrating that the fast fraction cannot be associated with a receptor-precoupled complex.

The association of the slow G protein fractions with a receptor–G-protein precoupled complex was further supported by the analysis of G $\beta$ -YFP mobility in  $car1^-$  and in  $g\alpha 2^-$  cells (Fig. 2). Both, G $\beta$ -YFP  $car1^-$  and G $\beta$ -YFP  $g\alpha 2^-$  cells were fully deficient in chemotactic signaling and unable to aggregate. For both cell types, mobility was best described by a two-fraction model, with decreased slow fraction size of  $18 \pm 3\%$  and  $27 \pm 4\%$  for G $\beta$ -YFP  $car1^-$  and G $\beta$ -YFP  $g\alpha 2^-$ , respectively (Fig. 2A). In addition, the diffusion constants of the slow fraction of G $\beta$ -YFP in both knockout cell types was found to be  $D_2 = 0.020 \pm 0.001 \mu\text{m}^2/\text{second}$  in  $g\alpha 2^-$

and  $D_2 = 0.023 \pm 0.001 \mu\text{m}^2/\text{second}$  in  $car1^-$ , respectively (Fig. 2B, left), higher than the diffusion constants in wild-type cells, and in particular the diffusion constant of cAR1. In comparison, the mobility of the fast fractions,  $D_1 = 0.16 \pm 0.01 \mu\text{m}^2/\text{second}$  in  $g\alpha 2^-$  and  $D_1 = 0.19 \pm 0.01 \mu\text{m}^2/\text{second}$  in  $car1^-$ , were unchanged compared with wild-type cells (Fig. 2C, left). Within levels of experimental uncertainty, G $\alpha$ 2 mobility was unchanged in  $car1^-$  and  $g\beta^-$  cells (Fig. 3B,C, left).

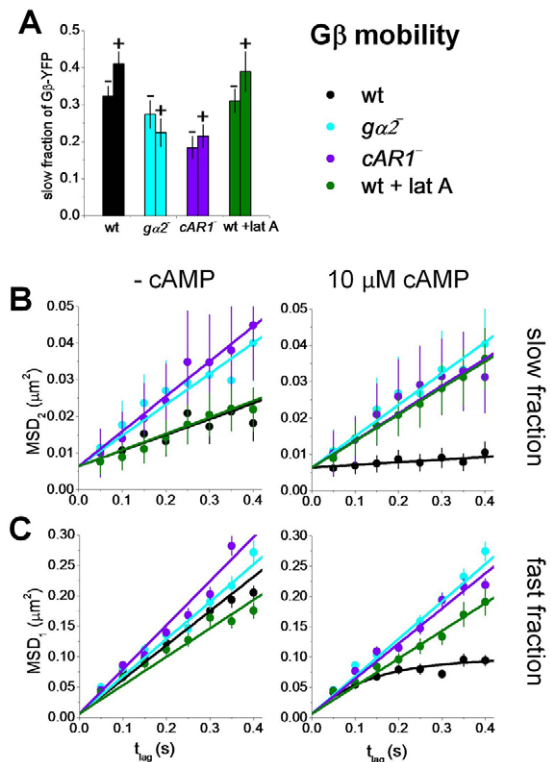

**Fig. 2. Mobility of G $\beta$ -YFP upon stimulation.** (A) Size of the slow fraction for G $\beta$ -YFP in wt (black) and  $g\alpha 2^-$  (light blue),  $car1^-$  (violet) and wt cells treated with  $0.5 \mu\text{M}$  lat A (green), before and after global stimulation with  $10 \mu\text{M}$  cAMP (indicated by – and +, respectively). The slowly diffusing population of G $\beta$ -YFP in wt cells increased after cAMP stimulation. The slow fractions of G $\beta$ -YFP in  $g\alpha 2^-$  and  $car1^-$  were smaller and did not change significantly upon cAMP addition. In latA-treated cells, the slow fraction was the same when compared with untreated cells. After stimulation, however, there was an increase similar to that found for cells with intact actin cytoskeleton. (B)  $MSD_2$  versus time-lag plot of the slow fraction of G $\beta$ -YFP in wt (black),  $g\alpha 2^-$  (light blue),  $car1^-$  (violet), and wt cells after treatment with  $0.5 \mu\text{M}$  latA (green) before (left) and after (right) stimulation with  $10 \mu\text{M}$  cAMP. In wt cells, the slow fraction was fully immobilized after cAMP stimulation. G $\beta$ -YFP in  $g\alpha 2^-$  and  $car1^-$  cells was diffusing nearly twice as fast as G $\beta$ -YFP in wt cells. In the knockout strains, cAMP addition did not influence the diffusion constants, suggesting that immobilization of the slow population of G $\beta$ -YFP in wt cells was due to signaling events. LatA-treated wt cells did not show any immobilization, suggesting that immobilization is caused by interaction of the G $\beta$  subunit with F-actin structures. (C)  $MSD_1$  versus time lag of the fast fraction of G $\beta$ -YFP in wt (black),  $g\alpha 2^-$  (light blue),  $car1^-$  (violet), and wt cells treated with  $0.5 \mu\text{M}$  lat A (green) before (left) and after (right) stimulation with  $10 \mu\text{M}$  cAMP. The diffusion behavior of G $\beta$ -YFP in wt cells changed from free (Eq. 1) to confined (Eq. 2) upon cAMP stimulation. This was not observed in latA-treated,  $g\alpha 2^-$  and  $car1^-$  cells, where G protein signaling was impaired. All values are means  $\pm$  s.e. obtained from ten bootstrap runs of the fitting routine.



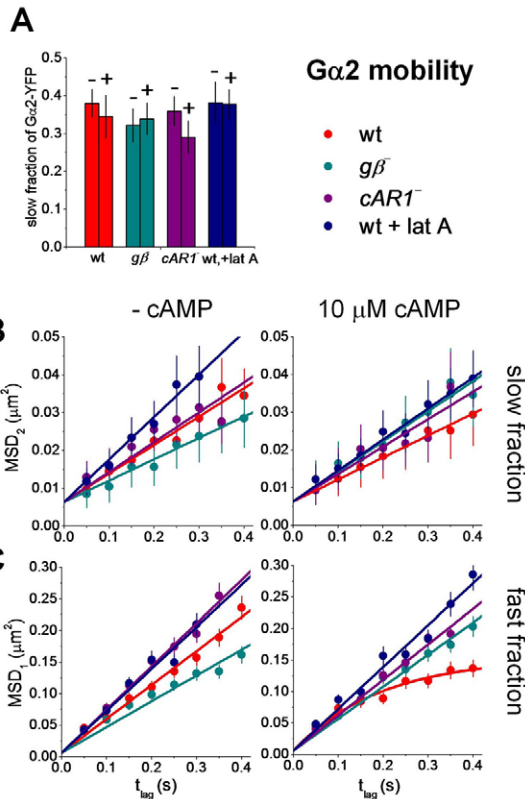

**Fig. 3. Mobility of Gα2-YFP upon stimulation.** (A) Size of the slow fraction of Gα2-YFP in wt (red),  $g\beta^-$  (cyan),  $car1^-$  (purple), and cells treated with 0.5  $\mu$ M latA (blue), before (–) and after (+) global stimulation with 10  $\mu$ M cAMP. (B) MSD<sub>2</sub> versus time lag of the slow fraction of Gα2-YFP in wt (red),  $g\beta^-$  (cyan),  $car1^-$  (purple), and cells treated with 0.5  $\mu$ M latA (blue) before (left) and after (right) uniform stimulation with 10  $\mu$ M cAMP. The diffusion of the slow fraction of Gα2-YFP was not influenced by stimulation with cAMP, knockout of  $g\beta$ , or disruption of the F-actin cytoskeleton. (C) MSD<sub>1</sub> versus time lag of the fast fraction of Gα2-YFP in wt (red),  $g\beta^-$  (cyan),  $car1^-$  (purple), and cells treated with 0.5  $\mu$ M latA (blue) before (left) and after (right) uniform stimulation with 10  $\mu$ M cAMP. The diffusion behavior of Gα2-YFP in wt changed from free (Eq. 1) to confined (Eq. 2) upon cAMP stimulation. This was not observed for latA-treated,  $g\beta^-$  or  $car1^-$  cells. All values are means  $\pm$  s.e. obtained from ten bootstrap runs of the fitting routine.

Additional support for our hypothesis on association of the slow fraction with a receptor–G-protein precoupled complex was obtained from the estimated expression levels of all components in wild-type and knockout cells. We used the membrane-localized fluorescence signal to estimate the density of Gβ-YFP and Gα2-YFP (see the Materials and Methods). Approximately  $7.7 \times 10^4$  Gβ-YFP were expressed, which is at the lower end of the expression level of reported endogenous Gβγ molecules of  $8 \times 10^4$ – $40 \times 10^4$  molecules (Jin et al., 2000). It was reported earlier that  $4 \times 10^4$  receptors were expressed in wild-type and in transformed cells (Van Haastert et al., 1996; de Keijzer et al., 2008), the active fraction of which,  $2 \times 10^4$  (~50% of  $4 \times 10^4$ ) (de Keijzer et al., 2008) corresponds very well to the number of slow Gβγ molecules,  $2.5 \times 10^4$  (~32% of  $7.7 \times 10^4$ ).

#### A fraction of Gβ-YFP becomes immobilized upon cAMP-induced receptor activation

To study the effect of cAMP-induced activation on Gα2 and Gβγ mobility, cells were uniformly stimulated with 10  $\mu$ M cAMP.

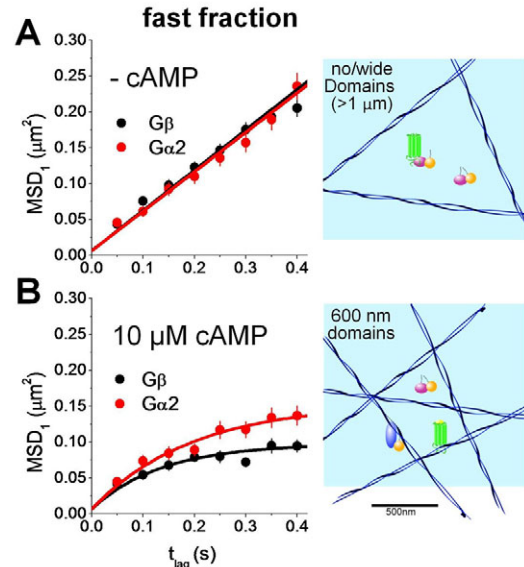

**Fig. 4. Comparison of the mobility of the fast fractions of Gβ-YFP and Gα2-YFP.** The behavior of the fast Gβ-YFP (black) and Gα2-YFP (red) on the apical membrane of wt *D. discoideum* (A) before, and (B) after uniform stimulation with 10  $\mu$ M cAMP changes from free to confined diffusion, respectively. The formed domains have an average side length of 600 nm. Error bars represent s.e. obtained from ten bootstrap runs of the fitting routine.

Single-molecule data were taken between 1 and 20 minutes after addition of cAMP (see the Materials and Methods). A redistribution of the fraction sizes and mobilities was observed. The slow fraction of Gβ-YFP increased to  $41 \pm 3\%$  upon stimulation (Fig. 2A), and became immobile ( $D_2 \leq 0.001$   $\mu$ m<sup>2</sup>/second; Fig. 2B, right).

Neither immobilization nor change in fraction size was observed for Gα2-YFP (Fig. 3A,B). Because Gα2 cycles rapidly between the membrane and the cytosol upon stimulation of cAR1 (Elzie et al., 2009), this latter finding suggests that a receptor–Gα2 complex is formed before the full receptor–G-protein heterotrimer complex.

The increase of the Gβ-YFP slow fraction and concomitant immobilization was not observed in Gβ-YFP  $car1^-$  and Gβ-YFP  $g\alpha 2^-$  cells, where the slow fraction was  $22 \pm 4\%$  and  $21 \pm 3\%$  after stimulation, respectively (Fig. 2A,B, right). This remaining slow fraction might be bound to other Gα subunits that are related to signaling via other G protein coupled receptors. Whereas the result on Gβ-YFP  $car1^-$  was predicted, the lack of Gβ-YFP response in Gβ-YFP  $g\alpha 2^-$  cells supports the notion that coupling to and activation by cAR1 requires Gα2. These observations together were taken as further support for the hypothesis that the slow Gα2-YFP and Gβ-YFP population reflected a receptor–G-protein precoupled complex, which dissociates upon ligand binding and receptor activation.

#### cAMP stimulation induces confined diffusion of fast Gα2-YFP and Gβ-YFP fractions into 600 nm membrane domains

Upon global cAMP stimulation, the fast fractions of both Gα2-YFP and Gβ-YFP changed their behavior from free diffusion (Eq. 1) to confined diffusion (Fig. 4, Eq. 2). Confined diffusion is a process in which a molecule is free to diffuse in a restricted domain

surrounded by impermeable fences. The corresponding relation between MSD and time lag is:

$$MSD(t_{lag}) = \frac{L^2}{3} \left( 1 - \exp\left(\frac{-12 D_{init} t_{lag}}{L^2}\right) \right) + s_0, \quad (2)$$

where  $D_{init}$  is the initial diffusion coefficient for small time lags, and  $L$  represents the side length of a square domain (Kusumi et al., 1993). From Fig. 4B, the domain size was determined to be  $600 \pm 100$  nm for both G $\alpha$ 2-YFP and G $\beta$ -YFP, and the initial diffusion constants  $D_{init,1} = 0.19 \pm 0.02$  and  $D_{init,1} = 0.16 \pm 0.02$   $\mu\text{m}^2/\text{second}$  for the two constructs, respectively.

### cAMP-induced membrane domains and G $\beta$ -YFP immobilization are F-actin dependent

To determine whether there is a relation between actin polymerization, the 600 nm membrane domains, and the cAMP-induced immobilization of the G $\beta$  slow fraction, aggregation-competent G $\beta$ -YFP wt cells were incubated with  $0.5 \mu\text{M}$  latrunculin A (latA) for 10 minutes. The diffusion behavior of G $\alpha$ 2-YFP and G $\beta$ -YFP was unchanged after latA treatment in unstimulated cells (Fig. 2B,C, left; Fig. 3B,C, left). However, upon global stimulation with  $10 \mu\text{M}$  cAMP, a significant change in diffusion behavior was observed. The slow fraction size of G $\beta$ -YFP increased slightly to  $39 \pm 5\%$ , and the immobilization seen for untreated cells disappeared ( $D_2 = 0.016 \pm 0.001$   $\mu\text{m}^2/\text{second}$ ; Fig. 2B, right). Furthermore, the confinement observed in the fast fractions of G $\alpha$ 2-YFP and G $\beta$ -YFP vanished and both constructs diffused freely with  $D_1 = 0.15 \pm 0.01$   $\mu\text{m}^2/\text{second}$  (Fig. 2C, right; Fig. 3C). These results led us to conclude that the membrane domains observed were F-actin dependent, and that immobilization of G $\beta$ -YFP required either a direct or an indirect interaction of G $\beta$ -YFP with the F-actin meshwork. It should be noted, however, that the increase of the slow fraction upon global cAMP stimulation was undisturbed by latA. By contrast, the immobilization of the slow G $\beta$ -YFP fraction was clearly regulated by F-actin and is presumably involved in maintaining cell polarity during chemotaxis.

### The increase of the slow fraction and G $\beta$ immobilization occurs selectively in the leading edge of *D. discoideum* cells

Whether the increase of the slow fraction and immobilization of G $\beta$ -YFP upon global stimulation with  $10 \mu\text{M}$  cAMP reflects a differential G protein behavior in the chemotaxis process was subsequently tested in a micropipette assay. The opening of a micropipette, filled with  $10 \mu\text{M}$  cAMP, was placed at a distance of  $75 \mu\text{m}$  from the cells generating a shallow cAMP gradient of  $\sim 0.4$  nM/ $\mu\text{m}$  at the cell position. After 1–3 minutes, cells became highly polarized and oriented towards the micropipette (Fig. 1A). The size of the slow fraction of G $\beta$ -YFP differed significantly when comparing leading to trailing edge, which were found to be  $38 \pm 4\%$  and  $23 \pm 3\%$ , respectively (Fig. 5A). Strikingly we found that the diffusion constants of the slow fraction were different at the anterior compared with the posterior: at the anterior, the slow G $\beta$ -YFP fraction was immobilized ( $D_2 < 0.001$   $\mu\text{m}^2/\text{second}$ ; Fig. 5C, left) exactly as observed upon global stimulation, whereas at the posterior, the diffusion constant was comparable with that found for unstimulated cells ( $D_2 = 0.012 \pm 0.001$   $\mu\text{m}^2/\text{second}$ ). We also found that the formation of the characteristic 600 nm domains was restricted to the anterior (Fig. 5B). All together, the behavior of G $\beta$  in the absence of agonist matches the behavior in the posterior, whereas G $\beta$  behavior at the anterior matches the situation observed

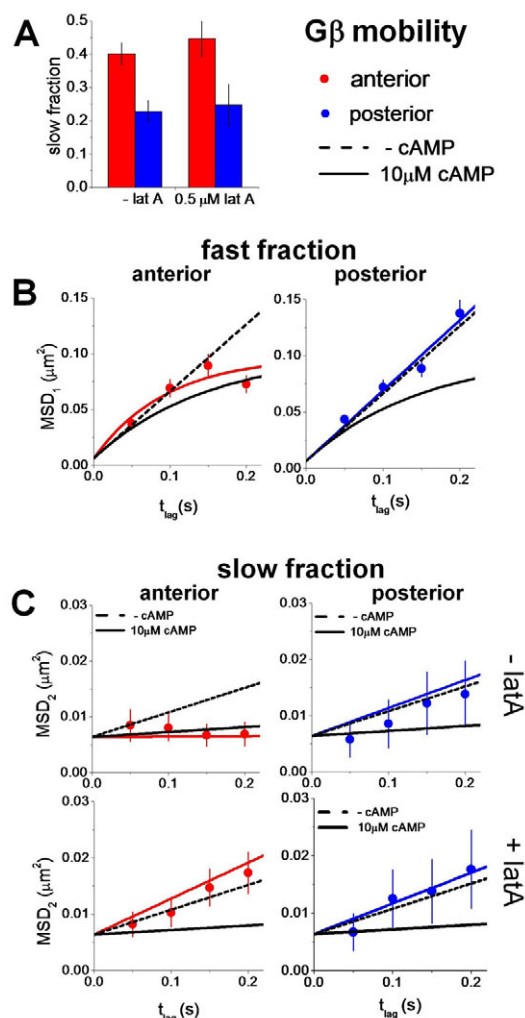

**Fig. 5. G $\beta$ -YFP mobility is highly polarized.** The diffusion of G $\beta$ -YFP in the anterior (red) and the posterior (blue) apical membrane of wt *D. discoideum* crawling in a shallow ( $0.4$  nM/ $\mu\text{m}$ ) cAMP gradient shows distinct differences. The black lines show the results obtained for cells before (dashed line; Fig. 1D, lower left and right) and after global stimulation with  $10 \mu\text{M}$  cAMP (solid line, Fig. 1D, lower right). (A) Slow fraction size of G $\beta$ -YFP in the leading (red) and trailing (blue) edge of wt cells (left) and cells treated with latA. (B) MSD<sub>1</sub> versus time lag for the fast fraction in the leading (red) and trailing edge (blue). Confinement was only observed for the fast fraction at the anterior upon stimulation with a cAMP gradient. (C) MSD versus time plot for the slow fraction in the leading (red) and trailing edge (blue) in wt cells (top) and cells treated with latA (bottom). In the wt cells, the slow fraction was immobilized in the front ( $D_2 < 0.001$   $\mu\text{m}^2/\text{second}$ ). Immobilization was not observed in latA-treated cells. All values are means  $\pm$  s.e. obtained from ten bootstrap runs of the fitting routine.

after global agonist stimulation. Micropipette experiments on latA-treated cells confirmed that F-actin, in part, controls G protein mobility in an activation-dependent manner. As latA-pretreated cells did not evolve any morphological polarity, we defined the part nearest to the micropipette as the anterior. The posterior part of the cell was defined accordingly. The difference in slow fraction size between the anterior and the posterior cell regions was found to be the same as that found in polarized cells with intact cytoskeleton (Fig. 4A, right). This finding could have been

predicted given that gradient sensing is an actin-independent process. Similarly to the case of uniform cAMP stimulation, the immobilization of G $\beta$ -YFP at the anterior, as well as the confined diffusion behavior of the fast fraction disappeared upon F-actin disruption.

### cAMP-induced domain formation is independent of PI3K and PLA2

To investigate whether the observed cAMP-induced changes in the mobility of the G $\beta$  subunits are the consequence of the activity of the PI3K pathway, we treated the cells with the PI3K inhibitor LY294002. At a concentration of 60  $\mu$ M and incubation times of 15 minutes, PI3K activity is reduced by >95% (Chen et al., 2007). In the absence of agonist, the inhibitor did not influence the mobility of G $\beta$  subunits. Uniform stimulation with 10  $\mu$ M cAMP also resulted in diffusion parameters that were similar to the control situation of wild-type cells stimulated with cAMP. The fast fraction was confined, revealing the presence of  $\sim$ 600 nm domains (Fig. 6C). The slow fraction in LY294002-treated cells was significantly slowed ( $D_2=0.006\pm0.001$   $\mu$ m<sup>2</sup>/second), but mobile (Fig. 6B). Similarly to the control experiments on global cAMP stimulation, the size of the slow fraction grew by 17% (Fig. 6A).

The observed results suggested that the F-actin-dependent domain formation was independent of PI3K activity. Although the PI3K–PTEN pathway is known to be important for ligand-induced actin polymerization, the latter finding is probably justified by the presence of parallel pathways. Therefore, in addition to LY294002, we also used the PLA2 inhibitor bromoenol lactone (BEL) at a saturating concentration of 5  $\mu$ M (Chen et al., 2007). Cells were incubated with both inhibitors and subsequently stimulated with 10  $\mu$ M cAMP. Treatment with both inhibitors did not result in any significant change in the mobility when compared with treatment with LY294002 alone (Fig. 6B). This result further proved the notion that additional pathways act in parallel to PI3K and PLA2 pathways and that they are sufficient for actin reorganization, albeit at a reduced efficient compared with when all pathways are active.

### Discussion

The spatiotemporal behavior and interaction of activated GPCRs with G proteins constitutes a key event in chemotaxis. Using single-molecule epifluorescence microscopy we measured G protein diffusion in the absence and presence of agonist and in cells in an agonist gradient. By analysis of the mobility in various signaling states, we developed a mechanistic model of the early steps in chemotactic signaling (Fig. 7). In the inactive state (Fig. 7, top), G proteins at the membrane are in one of two fractions: a highly mobile G $\alpha$ 2 $\beta$  $\gamma$  heterotrimer or a low-mobility receptor–G $\alpha$ 2 $\beta$  $\gamma$  precoupled complex. The receptor–G $\alpha$ 2 $\beta$  $\gamma$  complex, which accounts for 32% of the membrane-bound G $\alpha$ 2, 32% of the G $\beta$  $\gamma$ , and 50% of the activatable receptor population, was identified by comparison of their mobility. Binding of the G protein to the receptor leads to a slow-down in its mobility by one order of magnitude. This latter finding is in line with recent FRAP and TIRFM experiments (Elzie et al., 2009) in which an increase in membrane-bound G protein fraction on receptor activation has been found and attributed to G-protein–receptor interaction. Given that fast cytosolic proteins (Potma et al., 2001) are not visible with our technique and only lead to an increased background signal, our results provide a detailed view on the membrane-bound fraction and the processes that have a role within the membrane.

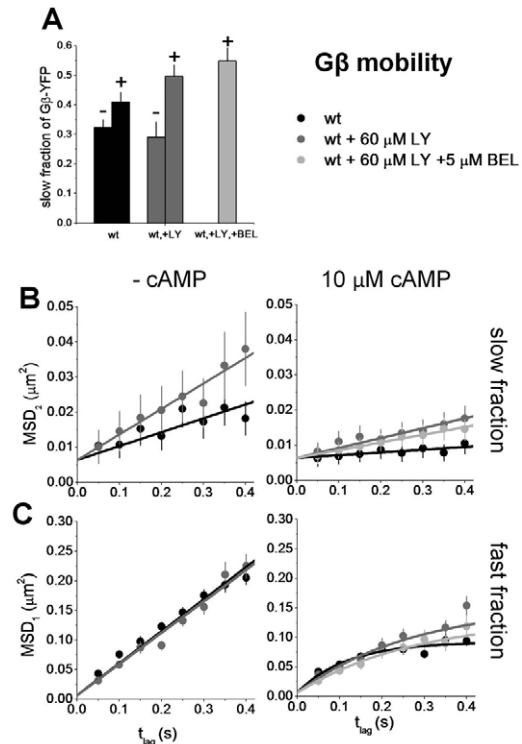

**Fig. 6. Mobility of G $\beta$ -YFP on inhibition of PI3K and PLA2.** Diffusion of G $\beta$ -YFP on the apical membrane of wt *D. discoideum* treated with the PtdIns(3,4,5) $P_3$  kinase inhibitor LY294002, and the PLA2 inhibitor bromoenol lactone (BEL). (A) Size of the slow fraction of G $\beta$ -YFP before and after uniform stimulation with 10  $\mu$ M cAMP in wt cells (black), cells treated with LY294002 (gray) and cells treated with both LY294002 and BEL (light gray). (B) MSD<sub>2</sub> versus time lag of the slow fraction of G $\beta$ -YFP in wt cells (black), cells treated with LY294002 (gray), and cells treated with both LY294002 and BEL (light gray) before (left) and after (right) uniform stimulation with 10  $\mu$ M cAMP. cAMP stimulation caused a dramatic slow down of the diffusion of the slow fraction in wt cells. This slow down was impaired after treatment with both inhibitors. (C) MSD<sub>1</sub> versus time plot of the fast fraction of G $\beta$ -YFP in wt cells (black), cells treated with LY294002 (gray), and cells treated with both LY294002 and BEL (light gray) before (left) and after (right) uniform stimulation with 10  $\mu$ M cAMP. Confinement upon cAMP stimulation was observed even in presence of both LY294002 and BEL. These findings suggest that a third parallel pathway, which was not inhibited [most likely the TorC2 pathway (Kamimura et al., 2008)], is acting in gradient sensing. All values are means  $\pm$  s.e. obtained from ten bootstrap runs of the fitting routine.

Receptor activation by stimulation with cAMP (Fig. 7, bottom) disrupts the equilibrium between the G $\alpha$ 2 $\beta$  $\gamma$  heterotrimer and the receptor–G $\alpha$ 2 $\beta$  $\gamma$  precoupled complex by allowing the latter to form an activated receptor–G $\alpha$ 2 $\beta$  $\gamma$  complex. This intermediate complex subsequently dissociates into a free activated receptor, and into free G $\beta$  $\gamma$  and G $\alpha$ 2<sup>GTP</sup> subunits. As argued by de Keijzer and colleagues (de Keijzer et al., 2008), the activated cAMP-receptor is able in turn to interact with and activate further G $\alpha$ 2 $\beta$  $\gamma$  heterotrimers (68% of the initial G $\beta$  $\gamma$  and the membrane-bound G $\alpha$ 2 population) (Fig. 7, bottom, red arrows), resulting in a local increase of G protein activation until cAMP dissociates from cAR1 at a rate of 0.4–1 second<sup>−1</sup> (Janssens and Van Haastert, 1987). It was predicted earlier (de Keijzer et al., 2008) that such a local amplification step, governed by the simultaneous increase in



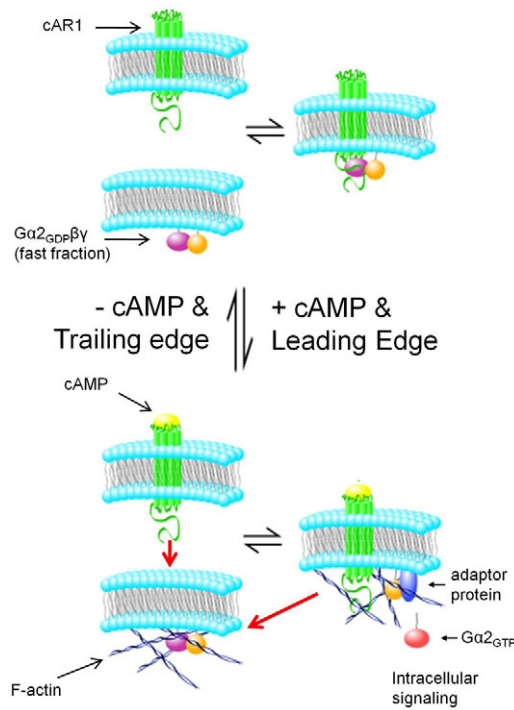

**Fig. 7. Model describing the dynamic cAR1-G-protein interaction at the leading and trailing edge.** Before cAMP stimulation (top) the G protein fast fraction is diffusing freely on the membrane with diffusion constant  $D=0.15 \mu\text{m}^2/\text{second}$ . The slow fraction ( $D=0.011 \mu\text{m}^2/\text{second}$ ) exists as a complex, which is precoupled to cAR1. 30% of the G protein and about 60% of the receptor population exist in this fraction. Upon binding of cAMP to the receptor (bottom), the G protein heterotrimer is dissociated: the  $\text{G}\alpha 2$  subunit exchanges GDP for GTP and diffuses into the cytosol where it is free to activate downstream signaling molecules. The previously precoupled cAR1 fraction is engaged in catalytic activation of the large G protein heterotrimer pool (indicated by red arrows). The  $\text{G}\beta\gamma$  heterodimeric subunit is immobilized by interaction with F-actin associated structures, which potentially serve to locally enhance chemotactic signaling. Tightening of membrane-associated F-actin restricts the diffusion of G proteins to  $\sim 600 \text{ nm}$  domains.

receptor mobility, will lead to a final fivefold linear amplification of the external cAMP gradient to an intracellular gradient in active  $\text{G}\beta\gamma$  proteins. The current experiments confirmed this prediction. Using the diffusion behavior of the G proteins as characterized here for the finite-element model described before (de Keijzer et al., 2008), we found that one cAR1 receptor activates 5–10 G proteins at gradient conditions that were experimentally realized.

In parallel to the increase in fraction size, we observed a slow-down of  $\text{G}\beta\gamma$  mobility upon stimulation. Since measurements were performed within 20 minutes of stimulation, a time after which adaptive processes have been initiated (Devreotes and Steck, 1979; Wessels et al., 1989), we conclude that the immobilization is not transient, but persists as long as cells are stimulated. The observation confirms the previously observed dose-dependent steady-state loss of FRET, which was explained by the dissociation of the  $\text{G}\alpha 2\beta\gamma$  complex into its subunits (Janetopoulos et al., 2001).

Following G protein activation and its downstream signaling, the actin cytoskeleton is reorganized (Franca-Koh et al., 2006). Reorganization leads to a tightening of membrane-associated F-actin, which is apparent in  $\text{G}\alpha 2$  and  $\text{G}\beta\gamma$  mobility and shows

confinement to F-actin-dependent domains of  $\sim 600 \text{ nm}$  in size. At this point, it is still unclear whether F-actin is sufficient for  $\text{G}\beta\gamma$  immobilization or whether associated proteins are needed to allow for the immobilization to occur. Inhibition of downstream PI3K (with  $60 \mu\text{M}$  LY294002) and PLA2 (with  $5 \mu\text{M}$  BEL), however, revealed that  $\text{G}\beta\gamma$  slow-down was dependent on PI3K and PLA2 only to a certain degree. Complete immobilization, as in the control experiment, was not observed. This might indicate either immobilization of only a part of the  $\text{G}\beta\gamma$  subunits, binding to less rigid F-actin fibers, or the fact that F-actin polymerizes only partially, as shown upon addition of any of these two inhibitors (Chen et al., 2007).

The formation of the  $600 \text{ nm}$  F-actin-dependent domains, by contrast, was undisturbed. The restriction of activated signaling molecules to a small part of the membrane by inhibiting them from moving across the cell leads to a suggestive biological role for F-actin-mediated confinement. Indeed, the leading edge of moving epidermal keratocytes isolated from fish has been described as a diffusion barrier, even for lipids (Weisswange et al., 2005).

Clustering of signaling components into a multicomponent signaling complex via a scaffold and/or anchoring proteins to the cytoskeleton was found for various signaling cascades (Pawson and Scott, 1997) and seems ubiquitous. After initial G protein activation and respective activation of downstream signaling, enhanced actin polymerization is observed at the front. Activated  $\text{G}\beta\gamma$  subunits are constrained to actin-dependent scaffolds at the leading edge. This process, which spatially restricts  $\text{G}\beta\gamma$  signaling, might in turn lead to a further enhancement of the related signaling cascade at the anterior of the cell in an F-actin-dependent positive-feedback loop. This process might facilitate chemotactic signaling by spatially restricting the activated signaling components in a larger protein complex: a signalosome. Our data show that, if domains are present before stimulation, they must have a side-length of  $L > 1 \mu\text{m}$  (Fig. 1D, lower left). Upon stimulation, such domains shrink to  $L = 600 \text{ nm}$  (Fig. 1D, lower right). Assuming a homogeneous distribution of receptors and G proteins in the cell membrane (surface area =  $540 \mu\text{m}^2$ , see the Materials and Methods) before stimulation, we estimate that such domains on average contain  $4 \times 10^4$  receptors per  $540 \mu\text{m}^2 \times (600 \text{ nm})^2 = 27$  receptors,  $\sim 48 \text{ G}\alpha 2$  subunits and  $\sim 52 \text{ G}\beta\gamma$  subunits. Experiments performed on F-actin-depleted cells have revealed that gradient sensing, the mere detection of the chemical gradient, was not impaired (Parent et al., 1998). Hence, the role of  $\text{G}\beta\gamma$  immobilization is probably related to the stabilization of pseudopods and perhaps, at a later stage, to the development of an innate cell polarity as is observed after prolonged directional stimulation of *D. discoideum* (Franca-Koh et al., 2006).

A variety of studies have clearly demonstrated that gradient sensing is reflected as a remarkable relocation of signaling components shortly after application of the chemical gradient (Parent et al., 1998; Comer and Parent, 2002; Xu et al., 2005).  $\text{PtdIns}(3,4,5)\text{P}_3$  and its related kinase (PI3K) are largely localized at the leading edge, whereas their related phosphatase (PTEN) is excluded from the anterior (Iijima and Devreotes, 2002). Despite extensive research, relocation of neither the receptor nor the G protein has ever been observed. Protein behavior and activation can be different at different locations owing to local variations in membrane curvature (Fischer et al., 2007), activated signaling cascades (Ueda et al., 2001) and the presence of signaling scaffolds (Pawson and Scott, 1997). Our experiments here show, as for the cAMP receptor, that cell polarization is reflected in a dynamic

property of the G proteins, namely their mobility, rather than in their localization. It is noteworthy that the polarized distribution of G $\beta\gamma$  mobility was found to be independent of the presence of F-actin: an identical distribution between fast (inactive) and slow (active) fractions was observed in cells treated with 0.5  $\mu\text{M}$  latA. From the fact that the initial diffusion constant, in contrast to the MSD behavior over time, is equal across the cell body during chemotaxis, we conclude that the 3D membrane structure is not an important factor in the interpretation of the molecular mobilities. Together, we conclude that the increase in G protein activity is related to gradient sensing and not to processes responsible for subsequent pseudopod stabilization or amplification and persistent cell polarity.

We and other groups have shown before that polarization in chemotaxing *D. discoideum* cells is present at the level of the GPCR (Ueda et al., 2001; de Keijzer et al., 2008). Here, we extended our model and show an F-actin-dependent, leading-edge-specific immobilization of the G $\beta\gamma$  heterodimer, which is an important mediator of chemotactic responses. We show that this immobilization is due to activation of the chemotactic pathway and hypothesize that F-actin functions, either directly or indirectly, as a signaling-enhancing scaffold, suggesting a function for this mechanism in the stabilization of pseudopods and the onset of a persistent leading edge. Likewise, in terms of a balanced inactivation model (Levine et al., 2006), which suggests a possible inhibitory function for G $\beta\gamma$ , binding G $\beta\gamma$  to F-actin would prevent its inhibitory function specifically at the leading edge, finally leading to the steep amplification of the activation signal observed in experiments.

## Materials and Methods

### Cell culture and transformation

*D. discoideum* axenically growing strain Ax2 (Watts and Ashworth, 1970) was used in this study and referred to as wild type (wt), to discriminate from other genetic backgrounds that were used. The wt, g $\beta^-$  (LW5), g $\alpha 2^-$  and *car1* $^-$  cells were transformed by electroporation with a plasmid, encoding the G $\beta$ -YFP fusion protein. The same procedure was followed for wt and g $\alpha 2^-$  and *car1* $^-$  cells with the plasmid encoding the G $\alpha 2$ -YFP fusion protein. G418 (Geneticin, Invitrogen) was used to select for successfully transformed *D. discoideum*. Cells were grown as a monolayer on plastic dishes in axenic culture medium, HL5-C (Formedium), containing 100  $\mu\text{g}/\text{ml}$  penicillin-streptomycin (1:1) (Invitrogen) and 20  $\mu\text{g}/\text{ml}$  G418, at 22°C.

### Cell preparation for measurements

To assess chemotactic competence, *D. discoideum* cells from axenic exponentially growing cultures were cultured in a plastic dish overnight in low fluorescence medium (Formedium). The physiological state of the cells treated in this way was comparable with cells starved for 1–2 hours. Next, the cells were detached from the plate, washed three times with developmental buffer (www.Dictybase.org), centrifuged for 3 minutes at 1500 r.p.m. and resuspended in 5 ml developmental buffer at a concentration of  $\sim 10^7$  cells/ml in a 100 ml Erlenmeyer flask. After 1 hour of shaking at 150 r.p.m., the cells were pulsed with a peristaltic pump (Gilson, Minipulse 2) with 30 nM cAMP at 6-minute intervals, for 4 hours for the transformants in wt background and overnight for transformants in knockout backgrounds (*Dictyostelium discoideum* protocols, Eichiner Rivero, 2006; Humana Press). After pulsing, the cells were shaken for an additional 30 minutes, and finally diluted in developmental buffer to a concentration of  $10^6$  cells/ml. Cells were transferred into two-well chambered coverslips (1.5 Borosilicate Sterile, Lab Tek II) where they were allowed to adhere.

### Developmental test

G $\alpha 2$ -YFP g $\alpha 2^-$  and G $\beta$ -YFP g $\beta^-$  transformants, as well as g $\alpha 2^-$  and g $\beta^-$  cells were pulsed overnight with 30 nM cAMP as described later, were plated on non-nutrient 1.5% agar plates at a concentration of  $3\text{--}4 \times 10^7$  cells/cm $^2$ . After 24 hours, the developmental state was assessed.

### Global cAMP stimulation assay

The developmental buffer, covering the developed cells in the chambered coverslips was supplemented with cAMP to a final concentration of 10  $\mu\text{M}$ . Experiments were performed within 20 minutes of addition of cAMP.

### Chemotaxis micropipette assay

Cells were placed at a distance of  $\sim 75$   $\mu\text{m}$  from the opening ( $r=0.25$   $\mu\text{m}$ ) of a pipette (Eppendorf femtotip) filled with 10  $\mu\text{M}$  cAMP. The internal pressure in the pipette was set to 40 kPa by means of a FemtoJet injector (Eppendorf). This set-up created a stable, shallow gradient estimated at 0.4 nM/ $\mu\text{m}$  cAMP over the cell body at a mid concentration of  $\sim 60$  nM. The gradient caused polarization of the developed *D. discoideum* cells towards the micropipette tip. The region of interest was set to the leading and trailing edge (30% of the cell body) of a polarized cell, respectively.

### Latrunculin A treatment

The developmental buffer, covering the developed cells in the chambered coverslips was supplemented with 0.5  $\mu\text{M}$  latrunculin A. After 10 minutes, single-molecule measurements were performed for 10 minutes. To observe the effect of latrunculin A on the cell response to cAMP, 10 minutes after addition of the latrunculin A, cAMP was added to the buffer at final concentration of 10  $\mu\text{M}$ , measurements were taken within 10 minutes of cAMP addition (Frigeri and Apgar, 1999).

### Single-molecule microscopy

The experimental set-up for single-molecule imaging has been described in detail previously (Schmidt et al., 1996). The samples were mounted onto an inverted microscope (Axiovert100, Zeiss) equipped with a 100 $\times$  objective (NA=1.4, Zeiss). The region of interest was set to 50 $\times$ 50 pixels. The apparent pixel size was 220 nm. Measurements were performed by illumination of the samples for 5 mseconds at 514 nm (Argon-ion laser, Spectra Physics) at intensity of 2 kW/cm $^2$ . The cells were photobleached for a period of 2–5 seconds and sequences of 500 images with a time lag of 50 mseconds were taken. Use of an appropriate filter combination (Chroma) permitted the detection of the fluorescence signal on a liquid-nitrogen-cooled CCD camera (Princeton Instruments). The set-up allowed imaging of individual fluorophores at a signal-to-background-noise ratio of  $\sim 30$ , leading to a positional accuracy of  $\sigma_0=40$  nm.

### Estimation of the expression level of G $\alpha 2$ -YFP and G $\beta$ -YFP

The expression level of G $\alpha 2$ -YFP in g $\alpha 2^-$ , and G $\beta$ -YFP in g $\beta^-$  cells was calculated in the following manner. The image of a single fluorescent molecule was given by an intensity distribution characterized by a full-width-at-half-maximum of  $w_0=1.7$ , pixel=0.37  $\mu\text{m}$ . The average signal for a single YFP molecule was  $S_1=220$  counts when illuminated with 2 kW/cm $^2$  for 5 mseconds at 514 nm (Harms et al., 2001). The fluorescence of G $\beta$ -YFP at the apical membrane at identical conditions was  $S_{G\beta}=4300$  counts/pixel, and for G $\alpha 2$ -YFP  $S_{G\alpha 2}=4000$  counts/pixel. The surface of the membrane for a whole cell (approximated by a spheroid with a short axis of  $r_1=5$   $\mu\text{m}$  and long axis  $r_2=10$   $\mu\text{m}$ ) is about 540  $\mu\text{m}^2$ . The fluorescence data were used in the estimation of the expression level yielding  $(S_{G\beta}/S_1) \times (A/w_0^2)=7.7 \times 10^4$  G $\beta$ -YFP and  $7.2 \times 10^4$  G $\alpha 2$ -YFP molecules per cell. A similar estimation has been done for the receptor yielding  $4 \times 10^4$  cAR1 molecules per cell (de Keijzer et al., 2008).

### Particle image correlation spectroscopy (PICS)

The reconstruction of trajectories from molecule positions is severely hampered by blinking and photobleaching of eYFP (Harms et al., 2001). Therefore, we used an alternative analysis method, particle image correlation spectroscopy (PICS), which is described in detail elsewhere (Semrau and Schmidt, 2007). In short, the cross-correlation between single-molecule positions at two different time lags is calculated. Subsequently, the linear contribution from uncorrelated molecules in close proximity is subtracted. This results in the cumulative distribution function  $cdf(r^2, t_{lag})$ , which yields the distribution of squared jump widths within the given time lag  $t_{lag}$ . For each time lag  $cdf(r^2, t_{lag})$  is fitted to a two-fraction model Eq. 4 (Fig. 1C,D).

### Analysis of the cumulative probability functions

From the jump-width distributions, the diffusion characteristics of all molecules is extracted. Given that the population of particles is homogeneous, the diffusion equation is solved for  $cdf(r^2, t_{lag})$  given by:

$$cdf(r^2, t_{lag}) = 1 - \exp\left(\frac{-r^2}{MSD(t_{lag})}\right), \quad (3)$$

where  $MSD(t_{lag})$  is the mean-square displacement at time lag  $t_{lag}$ . Given the exponential distribution in  $r^2$ , data are represented on  $\log(r^2)$ -scale. Our experimental data could not be fitted with this one fraction model, however (Fig. 1D). Therefore the data were fit to a two-fraction model described by:

$$cdf(r^2, t_{lag}) = 1 - \alpha \exp\left(\frac{-r^2}{MSD_2(t_{lag})}\right) - (1 - \alpha) \exp\left(\frac{-r^2}{MSD_1(t_{lag})}\right), \quad (4)$$

where  $MSD_2(t_{lag})$  is the characteristic mean squared displacement for the slow fraction of size  $\alpha$ , and  $MSD_1(t_{lag})$  the characteristic mean squared displacement for the fast fraction of size  $1-\alpha$ . The bi-exponential fit properly describes the experimental results (Fig. 1D). This showed that there are two fractions of G $\beta$ -YFP and of G $\alpha 2$ -YFP molecules that differ in their mobility on the membrane. Molecules were defined immobile when their MSD for the largest time lag (0.4 second) was smaller than twice the positional accuracy. Together with Eq. 1, this leads to an upper estimate for their diffusion constant of  $D_{immobile} < 0.001$   $\mu\text{m}^2/\text{second}$ .



We would like to thank the Dicty Stock Center (<http://dictybase.org/StockCenter/StockCenter.html>) for generously providing the *Dictyostelium discoideum* strains and plasmids. Sandra de Keijzer (U. Nijmegen, The Netherlands) is thanked for helpful discussions. This work was supported by funds from the Human Frontiers Science Program grant RGP66/2004, and the Dutch CYTTRON consortium sponsored by the ministry of economic affairs.

Supplementary material available online at  
<http://jcs.biologists.org/cgi/content/full/123/17/2922/DC1>

## References

- Chen, L., Janetopoulos, C., Huang, Y. E., Iijima, M., Borleis, J. and Devreotes, P. N. (2003). Two phases of actin polymerization display different dependencies on PI(3,4,5)P<sub>3</sub> accumulation and have unique roles during chemotaxis. *Mol. Biol. Cell* **14**, 5028-5037.
- Chen, L., Iijima, M., Tang, M., Landree, M. A., Huang, Y. E., Xiong, Y., Iglesias, P. A. and Devreotes, P. N. (2007). PLA2 and PI3K/PTEN pathways act in parallel to mediate chemotaxis. *Dev. Cell* **12**, 603-614.
- Comer, F. I. and Parent, C. A. (2002). PI 3-kinases and PTEN: how opposites chemoattract. *Cell* **109**, 541-544.
- de Keijzer, S., Serge, A., van Hemert, F., Lommerse, P. H. M., Lamers, G. E. M., Spaik, H. P., Schmidt, T. and Snaar-Jagalska, B. E. (2008). A spatially restricted increase in receptor mobility is involved in directional sensing during Dictyostelium discoideum chemotaxis. *J. Cell Sci.* **121**, 1750-1757.
- Devreotes, P. N. and Steck, T. L. (1979). Cyclic 3',5' AMP relay in Dictyostelium discoideum. II. Requirements for the initiation and termination of the response. *J. Cell Biol.* **80**, 300-309.
- Eichinger, L. and Rivero, F. (2006) *Dictyostelium Discoideum Protocols*. In *Methods in Molecular Biology*, Berlin, Springer.
- Elzie, C. A., Colby, J., Sammons, M. A. and Janetopoulos, C. (2009). Dynamic localization of G proteins in Dictyostelium discoideum. *J. Cell Sci.* **122**, 2597-2603.
- Fischer, T., Lu, L., Haigler, H. T. and Langen, R. (2007). Annexin B12 is a sensor of membrane curvature and undergoes major curvature-dependent structural changes. *J. Biol. Chem.* **282**, 9996-10004.
- Franca-Koh, J., Kamimura, Y. and Devreotes, P. N. (2006). Navigating signaling networks: chemotaxis in Dictyostelium discoideum. *Curr. Opin. Genet. Dev.* **16**, 333-338.
- Frigeri, L. and Apgar, J. R. (1999). The role of actin microfilaments in the down-regulation of the degranulation response in RBL-2H3 mast cells. *J. Immunol.* **162**, 2243-2250.
- Funamoto, S., Meili, R., Lee, S., Parry, L. and Firtel, R. A. (2002). Spatial and temporal regulation of 3-phosphoinositides by PI 3-kinase and PTEN mediates chemotaxis. *Cell* **109**, 611-623.
- Harms, G. S., Cognet, L., Lommerse, P. H., Blab, G. A. and Schmidt, T. (2001). Autofluorescent proteins in single-molecule research: applications to live cell imaging microscopy. *Biophys. J.* **80**, 2396-2408.
- Iijima, M. and Devreotes, P. N. (2002). Tumor suppressor PTEN mediates sensing of chemoattractant gradients. *Cell* **109**, 599-610.
- Jaakola, V. P., Griffith, M. T., Hanson, M. A., Cherezov, V., Chien, E. Y. T., Lane, J. R., IJzerman, A. P. and Stevens, R. C. (2008). The 2.6 Å crystal structure of a human A2A adenosine receptor bound to an antagonist. *Science* **322**, 1211-1217.
- Janetopoulos, C., Jin, T. and Devreotes, P. N. (2001). Receptor-mediated activation of heterotrimeric G-proteins in living cells. *Science* **291**, 2408-2411.
- Janssens, P. M. and Van Haastert, P. J. (1987). Molecular basis of transmembrane signal transduction in Dictyostelium discoideum. *Microbiol. Rev.* **51**, 396-418.
- Jin, T., Zhang, N., Long, Y., Parent, C. A. and Devreotes, P. N. (2000). Localization of the G protein complex in living cells during chemotaxis. *Science* **287**, 1034-1036.
- Kamimura, Y., Xiong, Y., Iglesias, P. A., Hoeller, O., Bolourani, P. and Devreotes, P. N. (2008). PIP3-independent activation of TorC2 and PKB at the cell's leading edge mediates chemotaxis. *Curr. Biol.* **18**, 1034-1043.
- Kimmel, A. R. and Parent, C. A. (2003). The signal to move: D. discoideum goes orienteering. *Science* **300**, 1525-1527.
- Kusumi, A., Sako, Y. and Yamamoto, M. (1993). Confined lateral diffusion of membrane receptors as studied by single particle tracking (nanovid microscopy). Effects of calcium-induced differentiation in cultured epithelial cells. *Biophys. J.* **65**, 2021-2040.
- Levine, H., Kessler, D. A. and Rappel, W. J. (2006). Directional sensing in eukaryotic chemotaxis: a balanced inactivation model. *Proc. Natl. Acad. Sci. USA* **103**, 9761-9766.
- Lilly, P., Wu, L., Welker, D. L. and Devreotes, P. N. (1993). A G-protein beta-subunit is essential for Dictyostelium development. *Genes Dev.* **7**, 986-995.
- Nobles, M., Benians, A. and Tinker, A. (2005). Heterotrimeric G proteins precouple with G protein-coupled receptors in living cells. *Proc. Natl. Acad. Sci. USA* **102**, 18706-18711.
- Palczewski, K., Kumasaka, T., Hori, T., Behnke, C. A., Motoshima, H., Fox, B. A., Trong, I. L., Teller, D. C., Okada, T., Stenkamp, R. E. et al. (2000). Crystal structure of rhodopsin: a G protein-coupled receptor. *Science* **289**, 739-745.
- Parent, C. A., Blacklock, B. J., Froehlich, W. M., Murphy, D. B. and Devreotes, P. N. (1998). G protein signaling events are activated at the leading edge of chemotactic cells. *Cell* **95**, 81-91.
- Pawson, T. and Scott, J. D. (1997). Signaling through scaffold, anchoring, and adaptor proteins. *Science* **278**, 2075-2080.
- Potma, E. O., de Boei, W. P., Bosgraaf, L., Roelofs, J., Van Haastert, P. J. and Wiersma, D. A. (2001). Reduced protein diffusion rate by cytoskeleton in vegetative and polarized dictyostelium cells. *Biophys. J.* **81**, 2010-2019.
- Rasmussen, S. G. F., Choi, H. J., Rosenbaum, D. M., Kobilka, T. S., Thian, F. S., Edwards, P. C., Burghammer, M., Ratnala, V. R. P., Sanishvili, R., Fischetti, R. F. et al. (2007). Crystal structure of the human [bgr]2 adrenergic G-protein-coupled receptor. *Nature* **450**, 383-387.
- Schmidt, T., Schutz, G. J., Baumgartner, W., Gruber, H. J. and Schindler, H. (1996). Imaging of single molecule diffusion. *Proc. Natl. Acad. Sci. USA* **93**, 2926-2929.
- Semrau, S. and Schmidt, T. (2007). Particle image correlation spectroscopy (PICS): retrieving nanometer-scale correlations from high-density single-molecule position data. *Biophys. J.* **92**, 613-621.
- Ueda, M., Sako, Y., Tanaka, T., Devreotes, P. N. and Yanagida, T. (2001). Single-molecule analysis of chemotactic signaling in Dictyostelium cells. *Science* **294**, 864-867.
- van Haastert, P. J., Bishop, J. D. and Gomer, R. H. (1996). The cell density factor CMF regulates the chemoattractant receptor cAR1 in Dictyostelium. *J. Cell Biol.* **134**, 1543-1549.
- Veltman, D. M., Van Haastert, P. J. (2006). Guanylyl cyclase protein and cGMP product independently control front and back of chemotaxing Dictyostelium cells. *Mol. Biol. Cell.* **17**, 3921-3929.
- Veltman, D. M. and Van Haastert, P. J. (2008). Four key signaling pathways mediating chemotaxis in Dictyostelium discoideum. *J. Cell Biol.* **180**, 747-753.
- Watts, D. J. and Ashworth, J. M. (1970). Growth of myxameobae of the cellular slime mould Dictyostelium discoideum in axenic culture. *Biochem. J.* **119**, 171-174.
- Weisswange, I., Bretschneider, T. and Anderson, K. I. (2005). The leading edge is a lipid diffusion barrier. *J. Cell Sci.* **118**, 4375-4380.
- Wessels, D., Schroeder, N. A., Voss, E., Hall, A. L., Condeelis, J. and Soll, D. R. (1989). cAMP-mediated inhibition of intracellular particle movement and actin reorganization in Dictyostelium. *J. Cell Biol.* **109**, 2841-2851.
- Wettschurek, N. and Offermanns, S. (2005). Mammalian G proteins and their cell type specific functions. *Physiol. Rev.* **85**, 1159-1204.
- Xu, X., Meier-Schellersheim, M., Jiao, X., Nelson, L. E. and Jin, T. (2005). Quantitative imaging of single live cells reveals spatiotemporal dynamics of multistep signaling events of chemoattractant gradient sensing in Dictyostelium. *Mol. Biol. Cell* **16**, 676-688.
- Zhang, N., Long, Y. and Devreotes, P. N. (2001). Ggamma in Dictyostelium: its role in localization of Gbeta gamma to the membrane is required for chemotaxis in shallow gradients. *Mol. Biol. Cell* **12**, 3204-3213.
